# Supplementary material
Source: publisher figshare collection journal article supplement (https://gsajournals.figshare.com/ndownloader/files/39017693)
Supplement: Supplementary file 1 [file 39017693]

## Sheet: Supp File 1
Seq Run	num_seqs	sum_len	avg_len	N50	Q20(%)	Q30(%)
Run 1 (R9.4.1)	2016993	4650614893	2305	3269	69.16	36.24
Run 2 (R9.4.1)	806605	1505157896	1866	2767	59.28	28.98
Run 3 (R10.4.1)	3213250	7530779825	2343	3847	83.73	66.9

## Sheet: Table 1
Assembly	Contigs	Length (bp)	Min length	Avg length	Max length	N50
Draft	2613	211232549	384	80839	6309645	698470
Final	1009	206036186	8001	204198	6309645	714500
BUSCO	Complete (%)	Single (%)	Duplicate (%)	Fragment (%)	Missing (%)	n
Draft	87.9	85.1	2.8	1.9	10.2	3285
Final	87.8	85.2	2.6	1.9	10.3	3285
	C:87.9%[S:85.1%,D:2.8%],F:1.9%,M:10.2%,n:3285
	C:87.8%[S:85.2%,D:2.6%],F:1.9%,M:10.3%,n:3285

## Sheet: Table 2
Species	Common name	vs. Dfam (%)	vs. Self (%)	vs. SGM (%)	Size (Mb)
Resseliella maxima	soybean gall midge	8.15	21.73	NA	206
Contarinia nasturtii	swede midge	2.3	13.25	6.04	186
Porricondyla nigripennis	NA	2.26	18.95	2.88	285
Sitodiplosis mosellana	wheat midge	3.28	17.26	7.01	181
Mayetiola destructor	Hessian fly	3.47	11.89	4.46	186
Catotricha subobsoleta	NA	5.51	29.78	5.57	277
		0.0815	0.2173	NA
		0.023	0.1325	0.0604
		0.0226	0.1895	0.0288
		0.0328	0.1726	0.0701
		0.0347	0.1189	0.0446
		0.0551	0.2978	0.0557
		8.15	21.73	NA
		2.3	13.25	6.04
		2.26	18.95	2.88
		3.28	17.26	7.01
		3.47	11.89	4.46
		5.51	29.78	5.57

## Sheet: Table 3
Name	Number	Length (bp)	Percentage (%)
Retroelements	12207	8108723	3.94
Penelope Class	117	29589	0.01
LINE Class	8858	5531322	2.68
L2/CR1/Rex	5902	3795681	1.84
RTE/Bov-B	2250	1427140	0.69
LTR Class	3349	2577401	1.25
BEL/Pao	902	975078	0.47
Ty1/Copia	645	559287	0.27
Gypsy/DIRS1	1802	1043036	0.51
DNA transposons	12991	5092926	2.47
hobo-Activator	1428	588862	0.29
Tc1-IS630-Pogo	8110	3313329	1.61
MULE-MuDR	61	27086	0.01
Other	55	25938	0.01
Rolling-circles	283	137313	0.07
Unclassified	82923	17722456	8.6
Total interspersed		30924105	15.01
Small RNA	453	142243	0.07
Simple repeats	252445	10436422	5.07
Low complexity	57017	3135087	1.52
Bases masked		44775170	21.73
